# Supplementary material
Source: HighWire-hosted journal article supplement (https://cmajopen.ca/highwire/filestream/85273/field_highwire_adjunct_files/2/2020-0186-original-submission.pdf)
Supplement: 2020-0186-original-submission.pdf [file 2020-0186-original-submission.pdf]

1  
2  
3 **Article type: Original Article**  
4

5 **Title: Patterns of Cost-related Medication Underuse among Canadian**  
6 **Adults with Cancer**  
7  
8

9  
10 **Short title: CRMU and Cancer Patients.**  
11

12  
13 **Authors:**  
14

15 Omar Abdel-Rahman<sup>1</sup> and Scott North<sup>1</sup>  
16

17  
18 <sup>1</sup>Department of Oncology; University of Alberta and Cross Cancer Institute; Edmonton;  
19 Alberta; Canada.  
20

21  
22 **Corresponding author**  
23

24 Omar Abdel-Rahman, MD  
25

26  
27 <sup>1</sup>Department of Oncology; University of Alberta and Cross Cancer Institute; Edmonton;  
28 Alberta; Canada. Ph: +1-780-432-8221; fax: 780-432-8888  
29

30  
31 Email: omar.abdelsalam@ahs.ca.  
32  
33  
34  
35  
36  
37  
38  
39  
40  
41  
42  
43  
44  
45  
46  
47  
48  
49  
50  
51  
52  
53

54 **ABSTRACT**  
55  
56  
57  
58  
59  
60

1  
2  
3 Objective:

4  
5 To assess the patterns of cost-related medication underuse (CRMU) among Canadian  
6 adults with cancer in a contemporary population-based cohort.  
7

8  
9 Methods:

10  
11 Datasets from the Canadian Community Health Survey (CCHS) (2015-2016) were  
12 accessed and adults ( $\geq 18$  years) with a history of cancer were reviewed. Information  
13 about sociodemographic features, health behaviors and CRMU were reviewed.  
14 Multivariable logistic regression analysis for factors associated with CRMU was  
15 conducted.  
16  
17  
18  
19

20  
21 Results:

22  
23 A total of 8581 eligible participants were included in the current study; including 460  
24 participants (5.4%) who reported CRMU and 8121 participants who did not report CRMU  
25 (94.6%). The following factors were associated with CRMU in multivariable logistic  
26 regression analysis: younger age (OR: 2.937; 95% CI: 2.365-3.646), female sex (OR for  
27 male sex versus female sex: 0.694; 95% CI: 0.552-0.872), indigenous racial background  
28 (OR for indigenous versus white racial group: 1.552; 95% CI: 1.077-2.236), unmarried  
29 status (OR for married versus unmarried: 0.667; 95% CI: 0.525-0.849), poor self-  
30 perceived health (OR for excellent versus poor self-perceived health: 0.494; 95% CI:  
31 0.304-0.805), lower income (OR for income  $<20,000$  versus income  $\geq 80,000$ : 2.449; 95%  
32 CI: 1.698-3.533) and lack of insurance for prescription medications OR: 2.337; 95% CI:  
33 1.878-2.910).  
34  
35  
36  
37  
38  
39  
40  
41  
42

43 Conclusion:

44  
45 CRMU is not uncommon among adults with cancer in Canada. The toll of the problem  
46 seems to be unequally carried by women, racial minorities and non-elderly ( $<65$  years)  
47 uninsured individuals. Discussion about a national pharmacare program for uninsured  
48 individuals is needed.  
49  
50

51  
52 **KEYWORDS:**

53  
54 Financial toxicity; pharmacare; cancer; Insurance coverage.  
55  
56  
57  
58  
59  
60

## INTRODUCTION

According to the Canadian constitution and Canada Health Act, healthcare is a provincial jurisdiction; but each province needs to provide medically necessary interventions in order to receive federal transfer payments (1). Therefore, and with very few exceptions, provincial healthcare insurance plans cover all procedures/treatments deemed medically necessary for cancer treatment (2).

That being said, additional supportive treatments not deemed medically necessary are not covered by these provincial plans and they have to be paid either privately or through other insurance plans. Moreover, the above-described provincial plans apply only to eligible individuals (including Canadian citizens, permanent residents and some residents on temporary visas). Unfortunately, it is not uncommon for some ineligible temporary workers or other migrants to fall in the cracks of the system and not to be covered for healthcare services (including cancer care). Moreover, and in some provinces, Canadian citizens and permanent residents have to wait for three months before their provincial coverage starts if they are moving from outside of the country (3).

All the above factors contribute to the ongoing problem of cost-related medication underuse (CRMU), where individuals either not fill a prescription or skip doses of a prescribed medicine because of financial hardship and lack of prescription medication coverage (4). While CRMU prevalence and associations in Canada have been evaluated in the non-cancer population in a number of studies before (5-7), prevalence and associations of CRMU among cancer patients and survivors have not been properly studied in a national cohort yet.

The Canadian Community Health Survey (CCHS) is a national annual survey that provides population-level data on social determinants of health, health behaviors and experiences of Canadians with healthcare system (8). It thus provides a good opportunity to examine factors associated with non-adherence/ underuse of prescribed medications which can be linked to different sociodemographic features.

## OBJECTIVE:

To assess the patterns of CRMU among Canadian adults with cancer in a contemporary population-based cohort.

## **METHODS**

### **DATA SOURCES AND COHORT SELECTION**

CCHS is a cross-sectional survey that is conducted annually to provide data about various health aspects of the residents of Canada who are older than 12 years (including attitudes, behaviors and conditions). It is estimated that approximately 97% of Canadians are represented within this survey and its sampling strategy follows a combination of area framing, phone list framing in addition to random dialing in some health regions. Under-representation/ non-representation have been reported for some individuals in some Quebec health regions, full-time members of the Canadian forces and those living in indigenous settlements. Further information about sampling strategy of the CCHS was provided in its publicly available documents (9). The current study is based on CCHS datasets for 2015-2016 (because detailed information about CRMU as well as insurance coverage were provided in these datasets).

The following criteria were used for cohort selection: 1) participants with history of cancer (defined by answering yes to either of these two questions: do you have cancer?; have you ever been diagnosed with cancer?); 2) complete information about CRMU (defined by the question coded PEX\_090 within the survey: During the last 12 months, was there a time when you did not fill or collect a prescription for medicine, or you skipped doses of your medicine because of the cost?). Participants who were not prescribed a medication in the last 12 months were excluded from the current cohort.

### **DATA COLLECTION**

The following data were included from each participant (where available): age at survey completion, sex, racial background (white, indigenous or others), marital status, income, insurance coverage (yes or no), type of insurance, educational level, self-perceived health and self-perceived mental health, food security (defined by whether participant was worried food would run out in the past 12 months or not), working status last week, emergency department visits and overnight hospital admission visits in the past 12 hours.

1  
2  
3 Based on whether participants reported current diagnosis or past diagnosis of cancer,  
4 they were classified into current cancer patients or cancer survivors. Moreover, the  
5 presence (self-reporting) of any of the following comorbidities was reviewed: asthma,  
6 chronic obstructive pulmonary disease, sleep apnea, fibromyalgia, arthritis, osteoporosis,  
7 hypertension, dyslipidemia, heart disease, stroke effects, diabetes mellitus, migraine,  
8 mood disorder and anxiety disorder.  
9

## 14 **STATISTICAL ANALYSES**

16 The main hypothesis of this study is that insurance coverage for prescription medications  
17 as well as higher socioeconomic status is associated with less CRMU among adults with  
18 history of cancer in Canada. In order to study this hypothesis, the following analysis were  
19 conducted:  
20  
21  
22

- 23  
24 1) Differences between participants who have versus those who have not history of  
25 CRMU were determined through Chi-Squared testing (for categorical variables)  
26 and independent t-test (for continuous variables). Interactions between age,  
27 insurance status, CRMU and other sociodemographic characteristics were further  
28 explored through Chi-Square testing.  
29
- 30  
31 2) Multivariable logistic regression was then conducted to evaluate the factors  
32 associated with CMRU among all participants. This model included age at survey  
33 completion, sex, racial background, marital status, income, insurance coverage,  
34 educational level, self-perceived health and self-perceived mental health. The  
35 presence of comorbidities was not included in this model because of the potential  
36 of collinearity between the presence of comorbidities and self-perceived health and  
37 self-perceived mental health (the presence of comorbidities should correlate  
38 significantly with each of these variables).  
39
- 40  
41 3) In order to further assess the impact of working status (unemployment) on CRMU  
42 among non-elderly (<65 years) adults with cancer, another multivariable logistic  
43 regression analysis was conducted which included all the variables as detailed  
44 above with exclusion of age (as all participants in this cohort were younger than  
45 65 years) and including working status from the last week. The reason for limiting  
46  
47  
48  
49  
50  
51  
52  
53  
54  
55  
56  
57  
58  
59  
60

1  
2  
3 this analysis to the cohort of non-elderly individuals is because most of elderly  
4 individuals (>65 years) should be retired by that age.  
5  
6

7 All statistical analyses were conducted through SPSS software (version 26.0, IBM, NY).  
8

## 9 **RESULTS**

### 10 **PARTICIPANTS' CHARACTERISTICS**

11  
12 A total of 8581 eligible participants were included in the current study; including 460  
13 participants (5.4%) who reported CRMU and 8121 participants who did not report CRMU  
14 (94.6%). Comparing both groups together, participants with CRMU were more likely to  
15 have younger age ( $P<0.001$ ), female sex ( $P<0.001$ ), non-white race ( $P<0.001$ ), poor self-  
16 perceived health ( $P<0.001$ ) and poor self-perceived mental health ( $P<0.001$ ), higher  
17 burden of comorbidity ( $P<0.001$ ), lower income ( $P<0.001$ ), and more likely to be  
18 unmarried ( $P<0.001$ ). Those patients were also more likely to visit the emergency  
19 department ( $P<0.001$ ), be admitted in the hospital ( $P<0.001$ ) and experience food  
20 insecurity ( $P<0.001$ ) (Table-1).  
21  
22

23 CRMU rates within different Canadian jurisdictions were described in figure-1a and it  
24 seems to be highest in British Columbia at 8% and lowest in Yukon at 0%. When the data  
25 were limited to non-elderly adults (<65 years), rates were higher in all jurisdictions  
26 (highest in Prince Edwards Island at 13.2% and lowest in Yukon at 0%) (Figure-1b).  
27  
28

29 Participants with CRMU were also more likely to lack insurance for prescription  
30 medications ( $P<0.001$ ) and when the cohort was stratified by insurance status and age,  
31 19.1% of non-elderly (<65 years) participants with no insurance coverage reported CRMU  
32 in the past 12 months prior to survey completion.  
33  
34

35 Within the cohort of non-elderly participants (<65 years), CRMU was associated with not  
36 having a job (CRMU was 12.6% among individuals who did not have a job versus 6.3%  
37 among individuals who worked in the last week before survey completion;  $P<0.001$ ).  
38 Distribution of unemployment according to racial background and sex was further  
39 explored among non-elderly participants. Non-elderly individuals with indigenous racial  
40 background were more likely not to have a job at the time of survey (53.2% versus 42.2%  
41  
42  
43  
44  
45  
46  
47  
48  
49  
50  
51  
52  
53  
54  
55  
56  
57  
58  
59  
60

1  
2  
3 among individuals with white background;  $P= 0.038$ ); on the other hand, sex did not  
4 appear to associate with unemployment ( $P=0.527$ ).  
5  
6

### 7 **FACTORS ASSOCIATED WITH CRMU AMONG ALL PARTICIPANTS**

### 8

9  
10 The following factors were associated with CRMU in multivariable logistic regression  
11 analysis: younger age (OR: 2.937; 95% CI: 2.365-3.646), female sex (OR for female sex  
12 versus male sex: 0.694; 95% CI: 0.552-0.872), indigenous racial background (OR for  
13 indigenous versus white racial group: 1.552; 95% CI: 1.077-2.236), unmarried status (OR  
14 for married versus unmarried: 0.667; 95% CI: 0.525-0.849), poor self-perceived health  
15 (OR for excellent versus poor self-perceived health: 0.494; 95% CI: 0.304-0.805), lower  
16 income (OR for income  $<20,000$  versus income  $\geq 80,000$ : 2.449; 95% CI: 1.698-3.533)  
17 and lack of insurance for prescription medications OR: 2.337; 95% CI: 1.878-2.910)  
18 (Table-2).  
19  
20  
21  
22  
23  
24  
25

### 26 **FACTORS ASSOCIATED WITH CRMU AMONG NON-ELDERLY PARTICIPANTS (<** 27 **65 YEARS)**

### 28

29  
30 The following factors were associated with CRMU in multivariable logistic regression  
31 analysis: female sex (OR for male sex versus female sex: 0.687; 95% CI: 0.506-0.932),  
32 indigenous racial background (OR for indigenous versus white racial group: 1.693; 95%  
33 CI: 1.116-2.568), unmarried status (OR for married versus unmarried: 0.636; 95% CI:  
34 0.465-0.871), poor self-perceived health (OR for excellent versus poor self-perceived  
35 health: 0.442; 95% CI: 0.225-0.866), lower income (OR for income  $<20,000$  versus  
36 income  $\geq 80,000$ : 1.942; 95% CI: 1.222-3.087) and lack of insurance for prescription  
37 medications OR: 2.705; 95% CI: 2.026-3.611) (Supplementary Table-1). Working status  
38 did not seem to impact CRMU (OR for not having a job versus work in the past week:  
39 1.320; 95% CI: 0.967-1.801).  
40  
41  
42  
43  
44  
45  
46  
47

### 48 **DISCUSSION**

### 49

50 The current study evaluates the patterns of CRMU among Canadian adults with cancer  
51 in a contemporary population-based study. It suggested that CRMU is not uncommon  
52 among adults with cancer in Canada. The toll of the problem seems to be unequally  
53 carried by women, racial minorities and non-elderly (<65 years) uninsured individuals.  
54  
55  
56  
57  
58  
59  
60



1  
2  
3 These results should ring the alarm bell with regards to this phenomenon and should lead  
4 to a real discussion about the position of a national pharmacare program to cover  
5 expenses for prescription medications for those individuals.  
6  
7

8  
9 Canada prides itself with a publicly funded healthcare system that provides coverage for  
10 all interventions deemed medically necessary; and in the context of cancer care, covers  
11 the expenses of necessary investigations and most of the approved anticancer  
12 treatments. While this is all true, it should be remembered also that many of those  
13 individuals with history of cancer have other medical conditions that might require  
14 treatment with other medications which are mostly not covered by provincial healthcare  
15 insurance plans. Because of the recorded association of cancer diagnosis and treatment  
16 with unemployment and long-term disability (10), consequences can be severe for cancer  
17 patients suffering from short- or long-term effects of cancer and its treatment and who are  
18 unable to provide for the expenses of medications. Equally alarming is the observation in  
19 the current study that many of those individuals with CRMU are struggling with food  
20 insecurity, with recent data suggesting higher mortality among Canadians struggling with  
21 food insecurity (11, 12). It is possible that the lack of financial means to provide for food  
22 has been an indirect result for the expenses of medications those patients have to pay  
23 for. It is important here also to highlight that linking drug plans to employment would mean  
24 that people who are chronically unemployed or underemployed (which include many  
25 cancer patients/ survivors) are going to be affected more. This is an important argument  
26 in favor of a universal drug coverage plan regardless of employment status.  
27  
28  
29  
30  
31  
32  
33  
34  
35  
36  
37  
38  
39  
40

41 The toll of these expenses seems to be unequally carried by some vulnerable subgroups  
42 of the society (including women and racial minorities). This is probably linked to lower  
43 socioeconomic status for these groups and subsequently inability to cover the expenses  
44 of medications. This is also consistent with previous studies suggesting worse cancer-  
45 specific and non-cancer-specific outcomes of cancer patients with lower socioeconomic  
46 status compared to those with higher socioeconomic status (13-16). Moreover, non-  
47 elderly (<65 years) individuals with a history of cancer seem to be particularly affected.  
48 The reason for this observation seems to be related to the fact that, within most Canadian  
49 jurisdictions, old age security plans provide some form of prescription medication  
50  
51  
52  
53  
54  
55  
56  
57  
58  
59  
60



1  
2  
3 coverage. Looking at figure 2, it is notable that individuals with governmental insurance  
4 still have considerable CRMU (5.2%). This type of insurance is usually provided to older  
5 individuals (as part of old age security programs), as well as those on disability and  
6 income supports. We need to look more as to why governmental coverage is under-  
7 performing compare to other forms of coverage. Of note here is that many people with  
8 drug plans still have co-pays and if some of the drugs are expensive (like many supportive  
9 medications for cancer patients) they may not be able to afford the copay even if they  
10 have insurance. Moreover, some drug plans have annual or lifetime caps on how much  
11 they reimburse participants (which may also be linked to all members covered by the  
12 plan) leaving some people in a decision that they may not want to use up their coverage  
13 for their terminal condition and leave behind a spouse who has no coverage because it  
14 was all exhausted or they may have no more coverage because it was all used up.

15  
16 While this data was collected pre COVID-19 pandemic, in the COVID era there are issues  
17 related to dispensing of drugs in only one-month supplies which means more dispensing  
18 fees. Initially, many oncologists would prescribe cancer supportive care medications to  
19 supply all scheduled cycles at once. This is not doable in the COVID era; so, these  
20 ancillary costs also make out of pocket expense go up for many cancer patients/  
21 survivors.

22  
23 Acknowledging the differences in healthcare organization and delivery between Canada  
24 and the United States, it remains valuable to compare the results of the current study with  
25 contemporary US studies evaluating CRMU. In a recent study based on the National  
26 Health Interview Survey (2011-2017), implementation of patient protection and  
27 Affordable Care Act led to a decrease in CRMU among cancer survivors, particularly non-  
28 elderly (<65 years) and those with lower income (17). These findings do highlight the  
29 positive impact of national programs providing medication coverage for vulnerable groups  
30 of the population. In another US study, also based on the National Health Interview  
31 Survey (2013-2015), adolescent and young adult cancer survivors were more likely to  
32 report CMRU and subsequently nonadherence to prescribed medications (18).

33  
34 The current study has a few limitations that need to be addressed. First, the self-reporting  
35 basis of the CCHS regarding the diagnosis of cancer, insurance coverage and CRMU

1  
2  
3 might raise some concerns regarding a possible bias in reporting. While this is possible,  
4 it should be remembered that many of the studies evaluating the same questions within  
5 Canada, US or elsewhere were based on similar self-reporting surveys (e.g. National  
6 Health Interview Survey in the US). For practical reasons, it is extremely difficult to answer  
7 these questions (with such a sufficiently large size of participants) using some forms of  
8 prospective research. Second, and like previously published CCHS studies, information  
9 about cancer primary site, treatment or stage are not available. Third, granular details  
10 about the medication being underused and possible linkage to overall and cancer-specific  
11 mortality are not available. While these are relevant data to look at, we know from  
12 previous population-based studies the serious consequences of medication  
13 nonadherence among cancer patients as well as the general population (19-21). These  
14 limitations need to be counterbalanced with the strengths of this study including the  
15 contemporaneous nature of data collection, large sample size as well as broad national  
16 view providing information about important inter-jurisdictional differences in Canada.  
17  
18

19 While it is expected that similar findings will be observed in a national non-cancer-specific  
20 cohort of participants in Canada, individuals with history of cancer represent a special  
21 subgroup that needs to be evaluated separately. Reasons include both the long-term  
22 socioeconomic and medical challenges brought about by cancer diagnosis with many of  
23 survivors who are cured from cancer being left with a host of medical problems that need  
24 to be treated as well as with possible treatment-related disabilities that would prevent  
25 them from working to provide for themselves, their families and their medical expenses  
26 (22). Thus, the burden of CRMU would be expected to be higher in this subgroup of the  
27 population and a special attention should be paid to them.  
28  
29

30 The current study also suggested that individuals with CRMU were more likely to visit  
31 emergency departments as well as be hospitalized. While this may be related to the  
32 observed imbalance in baseline comorbidities as well as to many other possible  
33 confounders, this also might suggest that apparent cost savings from lack of universal  
34 prescription medication coverage might backfire later on and cost public healthcare  
35 systems more through hospital admissions and other sequelae. This question needs to  
36 be formally addressed in a cost-effectiveness study.  
37  
38  
39  
40  
41  
42  
43  
44  
45  
46  
47  
48  
49  
50  
51  
52  
53  
54  
55  
56  
57  
58  
59  
60

1  
2  
3 In conclusion, CRMU is not uncommon adults with cancer in Canada. The toll of the  
4 problem seems to be unequally carried by women, racial minorities and non-elderly (<65  
5 years) uninsured individuals. Discussion about a national pharmacare program for  
6 uninsured individuals is needed.  
7  
8  
9  
10  
11  
12  
13  
14  
15  
16  
17  
18  
19  
20  
21  
22  
23  
24  
25  
26  
27  
28  
29  
30  
31  
32  
33  
34  
35  
36  
37  
38  
39  
40  
41  
42  
43  
44

Confidential

#### **Acknowledgment**

##### **Compliance with ethical standards**

##### **Ethical approval statement**

51 Because this study was based on the publicly available, open license, anonymized  
52 dataset, ethical approval was not required. The study was performed following the  
53  
54  
55  
56  
57  
58  
59  
60

1  
2  
3 ethical standards as laid down in the 1964 Declaration of Helsinki and its later  
4 amendments  
5

6  
7 **Disclosure of potential conflicts of interest**  
8

9 The authors have no conflicts of interest  
10

11  
12 **Patient consent statement**  
13

14 All included CCHS participants have signed informed consent as dictated by Statistics  
15 Canada policies.  
16  
17  
18  
19  
20

21 **Figure legends:**  
22

23 Figure-1: Geographic distribution of CRMU among a) all participants; b) non-elderly adults  
24 (<65 years).  
25  
26

27 Figure-2: Rate of CRMU according to the type of medication insurance coverage.  
28  
29  
30  
31  
32  
33  
34  
35  
36  
37  
38  
39  
40  
41  
42  
43

44  
45  
46  
47  
48  
49  
50  
51  
52  
53  
54  
55  
56  
57  
58  
59  
60

References

1. <https://www.canada.ca/en/health-canada/services/health-care-system/reports-publications/health-care-system/canada.html>. Last accessed 2/8/2020
2. <https://laws-lois.justice.gc.ca/eng/acts/C-6/> Last accessed 2/8/2020
3. <https://www.canada.ca/en/immigration-refugees-citizenship/services/new-immigrants/new-life-canada/health-care-card.html> Last accessed 2/8/2020
4. Gupta S, McColl MA, Guilcher SJ, Smith K. Cost-related nonadherence to prescription medications in Canada: a scoping review. *Patient Prefer Adherence*. 2018;12:1699-715.
5. Hennessy D, Sanmartin C, Ronksley P, Weaver R, Campbell D, Manns B, et al. Out-of-pocket spending on drugs and pharmaceutical products and cost-related prescription non-adherence among Canadians with chronic disease. *Health Rep*. 2016;27(6):3-8.

6. Tamblyn R, Egualé T, Huang A, Winslade N, Doran P. The incidence and determinants of primary nonadherence with prescribed medication in primary care: a cohort study. *Ann Intern Med*. 2014;160(7):441-50.
7. Després F, Perreault S, Lalonde L, Forget A, Kettani FZ, Blais L. Impact of drug plans on adherence to and the cost of antihypertensive medications among patients covered by a universal drug insurance program. *Can J Cardiol*. 2014;30(5):560-7.
8. <https://www.statcan.gc.ca/eng/survey/household/3226>. Last accessed on 31/12/2019
9. Statistics Canada Canadian Community Health Survey, available at <http://www.statcan.gc.ca/cgi-bin/imdb/p2SV.pl?Function=getSurvey&SDDS=3226>(=en&db=imdb&adm=8&dis=2
10. de Boer AGEM, Taskila T, Ojajärvi A, van Dijk FJH, Verbeek JHAM. Cancer Survivors and Unemployment: A Meta-analysis and Meta-regression. *JAMA*. 2009;301(7):753-62.
11. Men F, Gundersen C, Urquia ML, Tarasuk V. Association between household food insecurity and mortality in Canada: a population-based retrospective cohort study. *Canadian Medical Association Journal*. 2020;192(3):E53-E60.
12. Gundersen C, Tarasuk V, Cheng J, de Oliveira C, Kurdyak P. Food insecurity status and mortality among adults in Ontario, Canada. *PLoS One*. 2018;13(8):e0202642.
13. Abdel-Rahman O. Treatment choices and outcomes of non-metastatic hepatocellular carcinoma patients in relationship to neighborhood socioeconomic status: a population-based study. *Int J Clin Oncol*. 2020;25(5):861-6.
14. Abdel-Rahman O. Socioeconomic predictors of suicide risk among cancer patients in the United States: A population-based study. *Cancer Epidemiol*. 2019;63:101601.
15. Abdel-Rahman O. Impact of NCI Socioeconomic Index on the Outcomes of Nonmetastatic Breast Cancer Patients: Analysis of SEER Census Tract-Level Socioeconomic Database. *Clin Breast Cancer*. 2019;19(6):e717-e22.
16. Abdel-Rahman O. Prognostic impact of socioeconomic status among patients with malignant melanoma of the skin: a population-based study. *J Dermatolog Treat*. 2019:1-5.
17. Barnes JM, Johnson KJ, Adjei Boakye E, Sethi RKV, Varvares MA, Osazuwa-Peters N. Impact of the Patient Protection and Affordable Care Act on cost-related medication underuse in nonelderly adult cancer survivors. *Cancer*. 2020;126(12):2892-9.
18. Kaul S, Avila JC, Mehta HB, Rodriguez AM, Kuo Y-F, Kirchhoff AC. Cost-related medication nonadherence among adolescent and young adult cancer survivors. *Cancer*. 2017;123(14):2726-34.
19. Ho PM, Rumsfeld JS, Masoudi FA, McClure DL, Plomondon ME, Steiner JF, et al. Effect of medication nonadherence on hospitalization and mortality among patients with diabetes mellitus. *Arch Intern Med*. 2006;166(17):1836-41.
20. Shin JW, Jung SW, Lee SB, Lee BU, Park BR, Park EJ, et al. Medication Nonadherence Increases Hepatocellular Carcinoma, Cirrhotic Complications, and Mortality in Chronic Hepatitis B Patients Treated With Entecavir. *Am J Gastroenterol*. 2018;113(7):998-1008.
21. Gathright EC, Dolansky MA, Gunstad J, Redle JD, Josephson RA, Moore SM, et al. The impact of medication nonadherence on the relationship between mortality risk and depression in heart failure. *Health Psychol*. 2017;36(9):839-47.
22. Yabroff KR, Lund J, Kepka D, Mariotto A. Economic burden of cancer in the United States: estimates, projections, and future research. *Cancer Epidemiol Biomarkers Prev*. 2011;20(10):2006-14.

1  
2  
3  
4  
5  
6  
7  
8  
9  
10  
11  
12  
13  
14  
15  
16  
17  
18  
19  
20  
21  
22  
23  
24  
25  
26  
27  
28  
29  
30  
31  
32  
33  
34  
35  
36  
37  
38  
39  
40  
41  
42  
43  
44  
45  
46  
47

Table-1: Baseline characteristics according to CRMU (8581 participants):

| Variable                     | CRMU in the past 12 months (460 participants) | No CRMU in the past 12 months (8121 participants) | P value |
|------------------------------|-----------------------------------------------|---------------------------------------------------|---------|
| Age                          |                                               |                                                   |         |
| 18-64 years                  | 288 (62.6%)                                   | 2890 (35.6%)                                      | <0.001  |
| ≥65 years                    | 172 (37.4%)                                   | 5231 (64.4%)                                      |         |
| Sex                          |                                               |                                                   | <0.001  |
| Males                        | 122 (26.5%)                                   | 3176 (39.1%)                                      |         |
| Females                      | 338 (73.5%)                                   | 4945 (60.9%)                                      |         |
| Racial background            |                                               |                                                   | <0.001  |
| White                        | 388 (84.3%)                                   | 7429 (91.5%)                                      |         |
| Indigenous                   | 43 (9.3%)                                     | 333 (4.1%)                                        |         |
| Others                       | 25 (5.4%)                                     | 292 (3.6%)                                        |         |
| Unknown                      | 4 (0.9%)                                      | 67 (0.8%)                                         |         |
| Marital status               |                                               |                                                   | <0.001  |
| Married                      | 125 (27.2%)                                   | 3821 (47.1%)                                      |         |
| Unmarried                    | 334 (72.6%)                                   | 4281 (52.7%)                                      |         |
| Unknown                      | 1 (0.2%)                                      | 19 (0.2%)                                         |         |
| Self-perceived health        |                                               |                                                   | <0.001  |
| Excellent                    | 30 (6.6%)                                     | 820 (10.1%)                                       |         |
| Very good                    | 57 (12.4%)                                    | 2285 (28.3%)                                      |         |
| Good                         | 147 (32.1%)                                   | 2807 (34.7%)                                      |         |
| Fair                         | 139 (30.3%)                                   | 1473 (18.2%)                                      |         |
| Poor                         | 85 (18.6%)                                    | 698 (8.6%)                                        |         |
| Self-perceived mental health |                                               |                                                   | <0.001  |
| Excellent                    | 85 (18.5%)                                    | 2546 (30.3%)                                      |         |
| Very good                    | 125 (27.2%)                                   | 2825 (34.9%)                                      |         |
| Good                         | 132 (28.8%)                                   | 2105 (26%)                                        |         |
| Fair                         | 93 (20.3%)                                    | 559 (6.9%)                                        |         |
| Poor                         | 24 (5.2%)                                     | 156 (1.9%)                                        |         |
| Total household income       |                                               |                                                   | <0.001  |
| <20,000                      | 118 (25.7%)                                   | 1013 (12.5%)                                      |         |
| 20,000- <40,000              | 151 (32.8%)                                   | 2097 (25.8%)                                      |         |

|                                                              |             |              |        |
|--------------------------------------------------------------|-------------|--------------|--------|
| 40,000- <60,000                                              | 84 (18.3%)  | 1551 (19.1%) |        |
| 60,000- <80,000                                              | 38 (8.3%)   | 1103 (13.6%) |        |
| ≥80,000                                                      | 69 (15%)    | 2349 (29%)   |        |
| Education                                                    |             |              | 0.247  |
| Less than secondary school                                   | 92 (20.5%)  | 1866 (23.3%) |        |
| Secondary school                                             | 110 (24.5%) | 1751 (21.9%) |        |
| Post-secondary education                                     | 247 (55%)   | 4396 (54.9%) |        |
| Insurance for prescription medications                       |             |              | <0.001 |
| Yes                                                          | 306 (66.8%) | 6698 (83.1%) |        |
| No                                                           | 152 (33.2%) | 1359 (16.9%) |        |
| Cancer status                                                |             |              | 0.419  |
| Current diagnosis                                            | 100 (21.7%) | 1639 (20.2%) |        |
| Survivor                                                     | 360 (78.3%) | 6482 (79.8%) |        |
| Emergency department visits in the past 12 months (mean; SD) | 1.39; 3.036 | 0.73; 1.911  | <0.001 |
| Overnight hospital visits in the past 12 months              |             |              | <0.001 |
| Yes                                                          | 100 (21.7%) | 1228 (15.1%) |        |
| No                                                           | 360 (78.3%) | 6885 (84.9%) |        |
| Worried food would run out in the past 12 months             |             |              | <0.001 |
| Often true                                                   | 68 (21.8%)  | 98 (1.8%)    |        |
| Sometimes true                                               | 72 (23.1%)  | 258 (4.9%)   |        |
| Never true                                                   | 172 (55.1%) | 4880 (93.2%) |        |
| Comorbidities                                                |             |              | <0.001 |
| No comorbidities                                             | 25 (5.4%)   | 1062 (13.1%) |        |
| One comorbidity                                              | 64 (13.9%)  | 1666 (20.5%) |        |
| More than one comorbidity                                    | 353 (76.7%) | 5058 (62.3%) |        |
| Unknown                                                      | 18 (3.9%)   | 335 (4.1%)   |        |

\*CRMU: Cost-related medication underuse.



1  
2  
3  
4  
5  
6  
7  
8  
9  
10  
11  
12  
13  
14  
15  
16  
17  
18  
19  
20  
21  
22  
23  
24  
25  
26  
27  
28  
29  
30  
31  
32  
33  
34  
35  
36  
37  
38  
39  
40  
41  
42  
43  
44  
45  
46  
47

Table-2: Multivariable logistic regression analysis for factors associated with CRMU

| Factors                      | OR (95% CI)         | P value |
|------------------------------|---------------------|---------|
| Age                          |                     | <0.001  |
| ≥65 years                    | Reference           |         |
| 18-64 years                  | 2.937 (2.365-3.646) |         |
| Sex                          |                     | 0.002   |
| Females                      | Reference           |         |
| Males                        | 0.694 (0.552-0.872) |         |
| Racial background            |                     |         |
| White                        | Reference           |         |
| Indigenous                   | 1.552 (1.077-2.236) | 0.018   |
| Others                       | 1.304 (0.829-2.051) | 0.251   |
| Marital status               |                     | 0.001   |
| Unmarried                    | Reference           |         |
| Married                      | 0.667 (0.525-0.849) |         |
| Self-perceived health        |                     |         |
| Poor                         | Reference           |         |
| Excellent                    | 0.494 (0.304-0.805) | 0.005   |
| Very good                    | 0.329 (0.219-0.493) | <0.001  |
| Good                         | 0.639 (0.463-0.881) | 0.006   |
| Fair                         | 0.903 (0.662-1.231) | 0.518   |
| Self-perceived mental health |                     |         |
| Poor                         | Reference           |         |
| Excellent                    | 0.642 (0.374-1.102) | 0.108   |
| Very good                    | 0.804 (0.478-1.353) | 0.412   |
| Good                         | 0.843 (0.508-1.401) | 0.511   |
| Fair                         | 1.445 (0.862-2.423) | 0.162   |
| Total household income       |                     |         |
| ≥80,000                      | Reference           |         |
| <20,000                      | 2.449 (1.698-3.533) | <0.001  |
| 20,000- <40,000              | 2.363 (1.693-3.298) | <0.001  |
| 40,000- <60,000              | 1.797 (1.265-2.553) | 0.001   |
| 60,000- <80,000              | 1.118 (0.732-1.708) | 0.606   |

|   |                                        |                     |        |
|---|----------------------------------------|---------------------|--------|
| 1 | Education                              |                     |        |
| 2 | Post-secondary education               | Reference           |        |
| 3 | Less than secondary school             | 0.664 (0.506-0.870) | 0.003  |
| 4 | Secondary school                       | 0.962 (0.753-1.228) | 0.756  |
| 5 | Insurance for prescription medications |                     | <0.001 |
| 6 | Yes                                    | Reference           |        |
| 7 | No                                     | 2.337 (1.878-2.910) |        |

Confidential

1  
2  
3  
4  
5  
6  
7  
8  
9  
10  
11  
12  
13  
14  
15  
16  
17  
18  
19  
20  
21  
22  
23  
24  
25  
26  
27  
28  
29  
30  
31  
32  
33  
34  
35  
36  
37  
38  
39  
40  
41  
42  
43  
44  
45  
46  
47

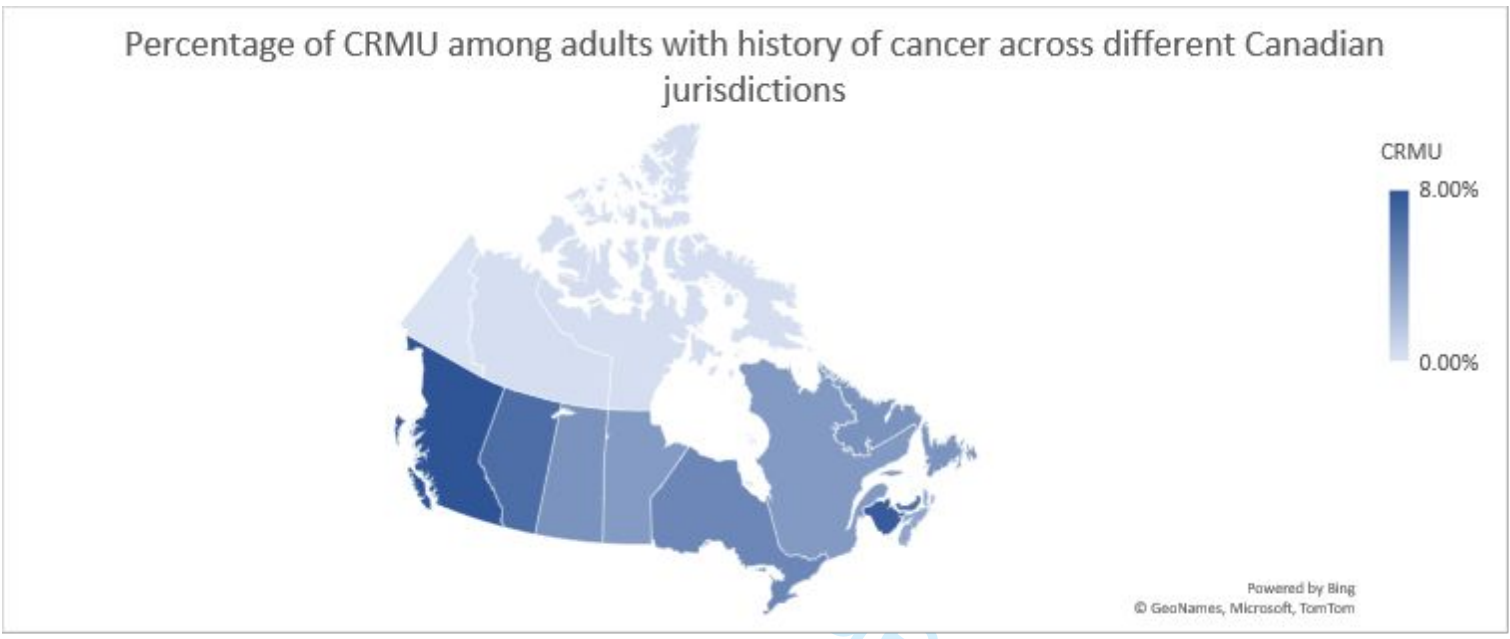

Figure-1a

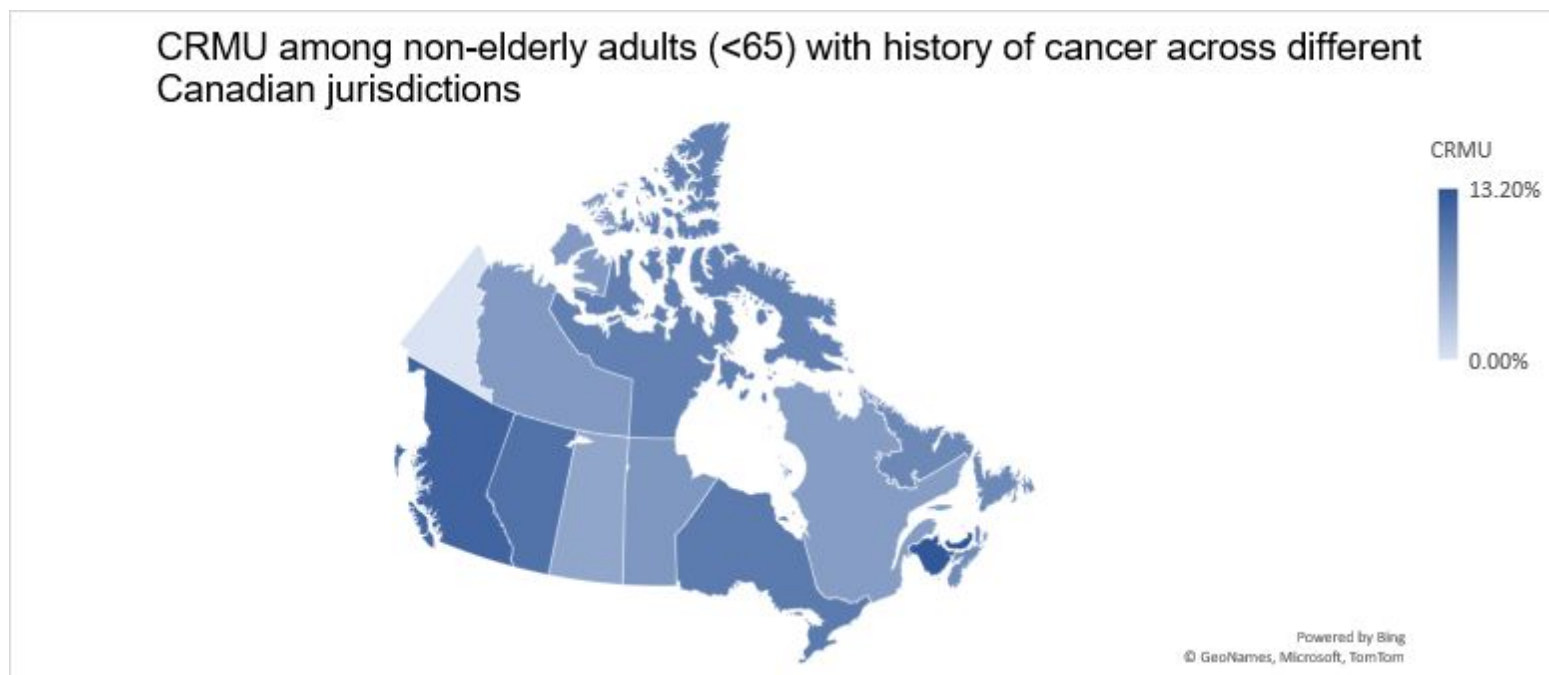

Figure-1b

1  
2  
3  
4  
5  
6  
7  
8  
9  
10  
11  
12  
13  
14  
15  
16  
17  
18  
19  
20  
21  
22  
23  
24  
25  
26  
27  
28  
29  
30  
31  
32  
33  
34  
35  
36  
37  
38  
39  
40  
41  
42  
43  
44  
45  
46  
47

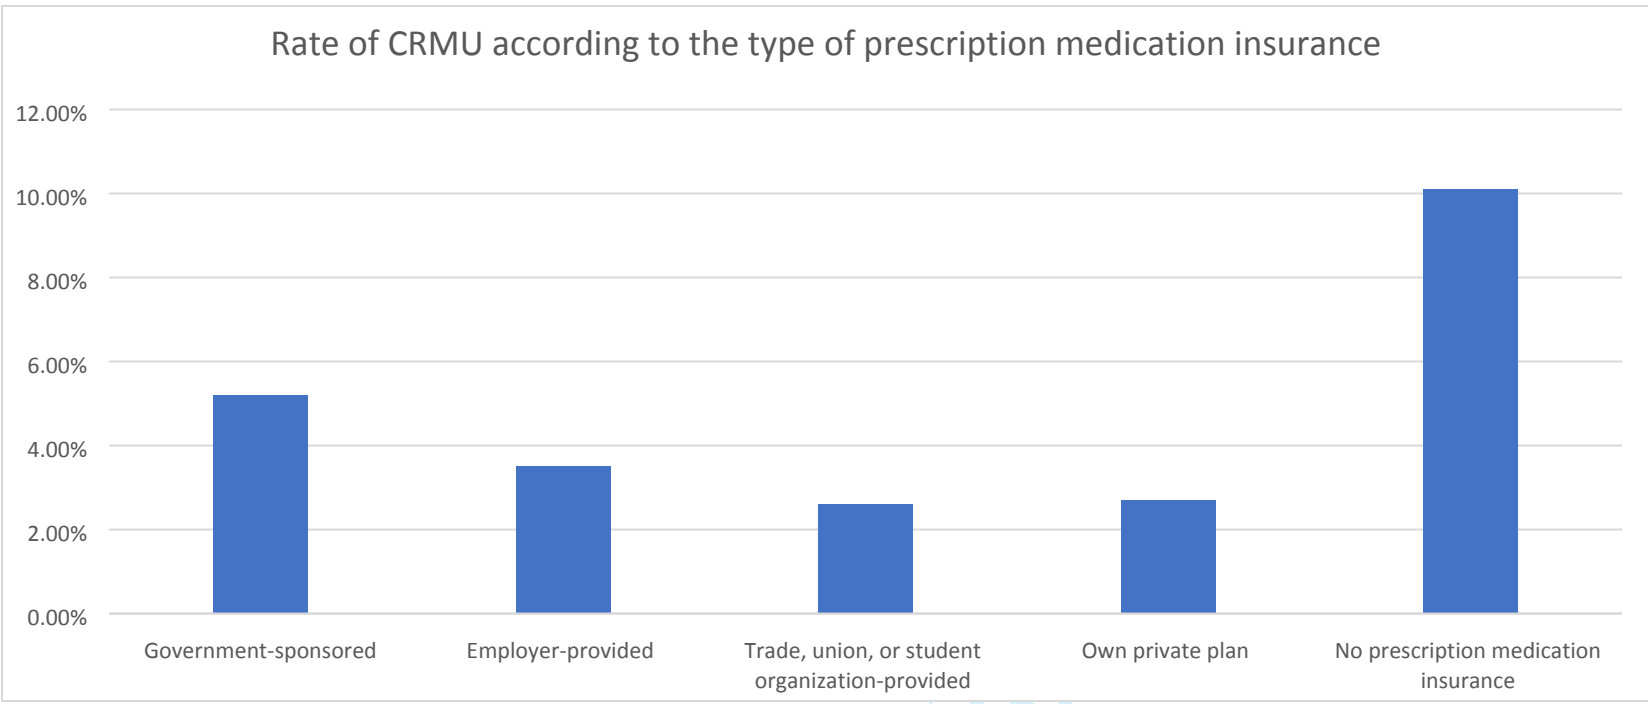

Figure-2

Supplementary table 1: Multivariable logistic regression analysis for factors associated with CRMU among non-elderly participants (&lt;65 years):

| Factors                      | OR (95% CI)         | P value |
|------------------------------|---------------------|---------|
| Working status last week     |                     |         |
| Worked at a job/business     | Reference           |         |
| Absent from work             | 1.065 (0.611-1.855) | 0.824   |
| Did not have a job           | 1.320 (0.967-1.801) | 0.080   |
| Sex                          |                     | 0.016   |
| Females                      | Reference           |         |
| Males                        | 0.687 (0.506-0.932) |         |
| Racial background            |                     |         |
| White                        | Reference           |         |
| Indigenous                   | 1.693 (1.116-2.568) | 0.013   |
| Others                       | 1.460 (0.851-2.503) | 0.169   |
| Marital status               |                     | 0.005   |
| Unmarried                    | Reference           |         |
| Married                      | 0.636 (0.465-0.871) |         |
| Self-perceived health        |                     |         |
| Poor                         | Reference           |         |
| Excellent                    | 0.442 (0.225-0.866) | 0.017   |
| Very good                    | 0.343 (0.199-0.592) | <0.001  |
| Good                         | 0.711 (0.466-1.087) | 0.115   |
| Fair                         | 1.121 (0.754-1.667) | 0.573   |
| Self-perceived mental health |                     |         |
| Poor                         | Reference           |         |
| Excellent                    | 1.043 (0.515-2.111) | 0.907   |
| Very good                    | 1.316 (0.671-2.583) | 0.424   |
| Good                         | 1.476 (0.766-2.844) | 0.244   |
| Fair                         | 2.250 (1.167-4.338) | 0.015   |
| Total household income       |                     |         |
| ≥80,000                      | Reference           |         |
| <20,000                      | 1.942 (1.222-3.087) | 0.005   |
| 20,000- <40,000              | 2.448 (1.617-3.707) | <0.001  |
| 40,000- <60,000              | 1.500 (0.963-2.337) | 0.073   |

1  
2  
3  
4  
5  
6  
7  
8  
9  
10  
11  
12  
13  
14  
15  
16  
17  
18  
19  
20  
21  
22  
23  
24  
25  
26  
27  
28  
29  
30  
31  
32  
33  
34  
35  
36  
37  
38  
39  
40  
41  
42  
43  
44  
45  
46  
47

|                                        |                     |        |
|----------------------------------------|---------------------|--------|
| 60,000- <80,000                        | 1.030 (0.616-1.720) | 0.911  |
| Education                              |                     |        |
| Post-secondary education               | Reference           |        |
| Less than secondary school             | 0.685 (0.468-1.003) | 0.052  |
| Secondary school                       | 0.827 (0.603-1.134) | 0.238  |
| Insurance for prescription medications |                     | <0.001 |
| Yes                                    | Reference           |        |
| No                                     | 2.705 (2.026-3.611) |        |

Confidential
